# Supplementary material
Source: publisher site journal article supplement (https://www.dovepress.com/article/565194)
Supplement: Supplementary file 1 [file 565194_Appendices%20update.docx]

**Appendix 1: Participant Information**

1. Age:………………………………………………………………………………..………….
2. Gender:………………………………………………………………………………….……
3. Place of residence:……………………………………………………………………….
4. Occupation (if applicable):…………………………………………………………….
5. Educational level:…………………………………………………………………………
6. Nationality:…………………………………………………………………………………
7. Number of medications taken daily:……………………………………………….
8. Number of GP consultations in the past 12 months:………………………….
9. Number of consultations with the general practice-based practice in the past 12 months (if applicable):…………………………………………………………..………
10. Number of consultations with the community pharmacist in the past 12 months:………………………………………………………………………….………....

**Appendix 2: Topic list**

**Introduction**

Good afternoon everyone, and welcome to this focus group. We appreciate that you have taken the time to participate in our study. Your input is extremely valuable and will help us gain meaningful insights into the role of the pharmacist in general practice.

During this session, we will discuss several topics related to your views on the role of the pharmacist within the general practice setting.

The focus group will last no more than two hours.

[For inexperienced patients only:] We will also provide a brief presentation with relevant background information on the activities and responsibilities of a practice-based pharmacist.

It is important to note that there are no right or wrong answers. We are interested in your honest opinions and experiences, so please feel free to share your thoughts openly. If anything is unclear or if you have questions at any point, please do not hesitate to ask.

Thank you once again for your participation. Let us begin with our first discussion topic.

**Topic List**

**Topic 1: Care Needs in long-term medication use**

**Main question:**
What kind of care do you need in relation to your medication treatment?

**Sub-questions:**

- What is the best place for this care, and at what moment?
- How can pharmacists support you with your medication and the care related to it?
  - Can you provide an example or share an experience?
- What role does your GP play in your medication and related care?
  - Can you provide an example or share an experience?
- How do you experience the current collaboration between your GP and pharmacist regarding your medication-related care?

**Topic 2: Patient expectations**

**Main question:**
What do you expect from a pharmacist working in a general practice?

**Sub-questions:**

- What could the pharmacist do or mean for you?
- What should the tasks of a practice-based pharmacist be?
- What skills or competencies should a pharmacist need to have to work effectively in a general practice?
- Which tasks currently performed by a GP or practice nurse could be done by a pharmacist?
  *For example: medication reviews, medication consultations, annual check-ups, deprescribing?*

**Topic 3: Advantages of pharmacists in general practice**

**Main question:**
What are potential advantages of having a pharmacist in general practice?

**Sub-questions:**

- For those with experience: what positive experiences have you had with a pharmacist in general practice?
  - Can you provide an example?
- How could having a practice-based pharmacist improve your healthcare?

**Topic 4: Disadvantages of pharmacists in general practice**

**Main question:**
What are potential disadvantages of having a pharmacist in general practice?

**Sub-questions:**

- For those with experience: what negative experiences have you had with a pharmacist in general practice?
  - Can you provide an example?
- How could having a practice-based pharmacist worsen your healthcare?

**Topic 5: Hybrid Model**

*(This model is explained during the presentation.)*

**Main question:**
What do you think of pharmacists working both in community pharmacy and in general practice (e.g., two days per week in the pharmacy and three days in the practice)?

**Sub-questions:**

- What are the advantages or disadvantages of pharmacists working in both settings?
- Would you have more, equal, or less trust in a pharmacist who works both in the pharmacy and in the general practice?
- How might pharmacists working in both settings improve or worsen your healthcare?

**Topic 6: Preconditions**

**Main question:**
What are important preconditions for you when a pharmacist provides care within the general practice?

Consider aspects such as:

- Data exchange, ICT, shared medical records
- Privacy
- Reimbursement
- Collaboration with other healthcare providers
- Additional training for pharmacists
